# Supplementary material for: Effect of perioperative probiotic therapy on postoperative cognitive dysfunction after non-cardiac surgery under general anesthesia in elderly patients with frailty
Source: Research Square preprint supplement (doi:10.21203/rs.3.rs-7241135/v1), 2025-12-08
Supplement: Supplementary file 1 [file 79f269dfe4feb38258b3c798.xlsx]

## Sheet: Sheet1
实验组
	性别	年龄	身高	体重	BMI	合并症	衰弱评分	教育程度	ASA分级	手术名称	术前MMSE评分	术后1天MMSE评分	分值差	术后7天MMSE评分	分值差	术后14天MMSE评分	分值差	手术时间	麻醉时间	麻醉方法	术中不良事件	出血量	是否输血	输液量	抗生素	术后抗生素使用天数	术后镇痛	术后并发症/ICU	术后住院时间	睡眠	排气时间	进食流质时间	进食固体食物时间	排便时间
1	男	77	152	48	20.7756	贫血	4	小学	3	结肠癌根治	24	24	0	24	0	24	0	160	200	复合	无	100	否	2700	β-类酰胺类	5	PCIA	无	10	欠佳	9	2	5	5
2	男	80	156	42	17.2584	高血压	3	小学	3	结肠癌根治	24	23	1	24	0	25	-1	139	180	复合	无	10	否	1500	否	5	无	无	9	可	10	2	4	5
3	女	79	150	40	17.7778	颈动脉斑块	3	文盲	2	股骨骨折PFNA内固定术	27	26	1	26	1	27	0	130	150	复合	无	200	否	1200	β-类酰胺类	2	无	无	7	尚可	6	1	2	2
4	男	80	165	64	23.5078	直肠癌术后，肺癌术后、痛风	4	高中	3	腹腔镜结肠病损切除	26	25	1	27	-1	27	-1	159	200	全麻	无	10	否	1800	β-类酰胺类	4	无	无	10	可	9	3	5	4
5	男	73	173	60	20.0474	高血压，脊柱侧弯，贫血	3	小学	3	股骨切开复位内固定	27	26	1	27	0	27	0	122	189	复合	无	300	否	1600	β-类酰胺类	3	PCIA	无	7	欠佳	5	1	2	1
6	男	66	168	70	24.8016	高血压、肿瘤化疗后	3	高中	3	左肺上叶切除	30	30	0	30	0	30	0	151	215	复合	无	200	否	1600	β-类酰胺类	5	PCIA	无	8	可	6	1	2	2
7	男	66	170	66	22.8374	高血压、肺癌术后	3	初中	3	肺叶切除	27	26	1	28	-1	28	-1	175	247	复合	无	200	否	1900	β-类酰胺类	6	PCIA	无	7	可	6	1	3	2
8	男	65	165	40	14.6924	贫血 痛风病史 消瘦	4	初中	3	肺部分切除	26	25	1	26	0	26	0	123	170	全麻	无	30	否	1100	β-类酰胺类	5	PCIA	无	8	可	5	1	2	2
9	男	68	173	58	19.3792	高血压；COPD	3	初中	3	肺叶切除	27	27	0	27	0	27	0	190	267	复合	无	300	否	2000	β-类酰胺类	6	PCIA	无/入	7	可	6	2	3	1
10	女	69	145	39	18.5493	高血压、糖尿病	3	文盲	3	直肠癌根治	24	23	1	25	-1	25	-1	120	164	全麻	无	5	否	1600	喹诺酮类	4	PCIA	无	9	尚可	10	3	5	4
11	女	70	158	60	24.0346	高血压、糖尿病、复发垂体瘤	3	初中	3	胃癌根治	25	22	3	25	0	25	0	209	313	全麻	无	50	否	2225	β-类酰胺类	5	无	无/入	10	尚可	7	3	7	3
12	女	66	145	47	22.3543	糖尿病	4	小学	3	胸腔镜中转开胸左肺下叶切除	24	24	0	24	0	25	-1	136	205	复合	无	400	否	2100	喹诺酮类	4	无	无	7	可	6	2	4	2
13	男	68	170	60	20.7612	肺气肿、肺大泡、高血压	3	高中	3	直肠癌根治	29	28	1	29	0	29	0	150	175	全麻	无	200	否	1700	β-类酰胺类	4	无	无	10	可	9	3	5	4
14	男	69	167	42	15.0597	贫血	3	小学	2	胸腔镜肺叶切除	27	24	3	27	0	27	0	170	232	复合	无	50	否	1950	β-类酰胺类	5	PCIA	无	7	可	7	1	3	2
15	男	64	166	67	24.3141	高血压、动脉硬化等	3	初中	3	胸腔镜肺叶切除	27	26	1	26	1	27	0	120	160	复合	无	200	否	1100	喹诺酮类	5	PCIA	无	7	可	6	1	2	1
16	男	71	165	52	19.1001	肺气肿、心律失常	3	初中	3	腹腔镜直肠癌根治术	29	29	0	30	-1	29	0	225	300	全麻	无	50	否	2200	喹诺酮类	5	PCIA	无/入	10	可	9	4	7	5
17	男	72	170	70	24.2215	气胸、高血压、下肢静脉血栓	4	初中	3	单孔胸腔镜肺大泡切除	27	26	1	28	-1	28	-1	120	189	复合	无	100	否	1400	β-类酰胺类	6	PCIA	无	6	尚可	7	1	2	2
18	女	85	141	50	25.1496	肝功能异常、高血压、肺气肿	4	文盲	3	骨折内固定	24	20	4	21	3	23	1	140	270	全麻	无	20	否	2300	β-类酰胺类	3	无	MODS/入	6	尚可	6	1	3	2
19	男	74	170	63	21.7993	高血压、肺气肿	3	初中	2	骨折内固定	27	27	0	28	-1	27	0	150	180	全麻	无	20	否	1800	否	2	无	无	7	可	7	1	2	2
20	男	80	170	45	15.5709	肝肾功不全、直肠癌术后	3	小学	3	乙状结肠部分切除	26	20	6	22	4	25	1	140	190	全麻	无	50	否	1000	否	4	PCIA	液气胸	13	欠佳	10	3	6	4
21	男	72	165	45	16.5289	肺气肿、恶病质	3	文盲	3	髋关节置换术	27	26	1	26	1	27	0	150	160	全麻	无	100	否	1600	β-类酰胺类	2	PCIA	肺不张	8	尚可	6	1	3	3
22	男	85	160	50	19.5312	肺气肿、肾功能异常等	3	小学	3	骨折内固定	28	28	0	29	-1	29	-1	185	235	复合	无	100	否	1700	喹诺酮类	3	PCIA	无/入	6	可	5	1	2	2
23	女	79	148	52.5	23.9682	高血压、糖尿病、甲亢	3	初中	3	肱骨骨折切开复位内固定	27	26	1	27	0	27	0	170	220	复合	无	300	是	1400	β-类酰胺类	3	PCIA	无	7	欠佳	6	1	2	1
24	男	67	161	52	20.061	高血压、心律失常、肾功能异常	3	初中	3	结肠部分切除	28	28	0	28	0	28	0	140	180	全麻	无	5	否	2100	β-类酰胺类	5	无	无	11	可	9	3	6	4
25	女	71	155	56	23.3091	高血压、糖尿病、心脏病、甲亢	3	小学	3	直肠部分切除	28	27	1	28	0	28	0	175	225	复合	无	50	否	1800	β-类酰胺类	5	PCIA	无	10	可	9	3	5	4
26	男	71	160	65	25.3906	高血压	3	小学	2	腹腔镜直肠癌根治术	27	27	0	28	-1	27	0	155	225	全麻	无	50	否	2100	β-类酰胺类	5	PCIA	无	9	可	8	4	6	5
27	男	67	150	60	26.6667	肺气肿、心律失常	3	小学	3	肺部分切除术	27	26	1	27	0	27	0	200	250	全麻	无	20	否	1700	β-类酰胺类	6	无	肺部感染	8	欠佳	6	1	2	2
28	女	96	140	50	25.5102	高血压、阿尔兹海默症	4	文盲	3	膝关节置换	22	21	1	22	0	23	-1	130	190	复合	低血压	20	否	1600	喹诺酮类	2	PCIA	无	8	可	4	1	2	1
29	男	68	164	55	20.4491	贫血、心律失常、颈动脉斑块	3	初中	3	食管癌根治	27	28	-1	28	-1	26	1	185	270	全麻	否	200	否	2100	喹诺酮类	6	PCIA	心律失常/入	10	可	9	5	10	5
30	男	70	166	56	20.3223	慢支炎	3	小学	3	胃癌根治	24	23	1	25	-1	24	0	145	190	全麻	无	5	否	1700	喹诺酮类	6	否	无	9	可	7	4	8	3
31	男	70	170	65	22.4913	贫血	3	初中	3	腹腔镜胃部分切除术	27	27	0	27	0	27	0	140	180	全麻	无	400	是	1500	β-类酰胺类	5	PCIA	无	10	可	7	4	7	3
32	男	73	155	56	23.3091	心律失常	3	文盲	3	肺部分切除	25	24	1	26	-1	25	0	130	150	复合	无	100	否	1500	β-类酰胺类	5	PCIA	无	7	可	7	1	2	2
33	女	75	155	66	27.4714	高血压、糖尿病、肌间静脉血栓形成	4	文盲	3	胫骨骨折内固定	26	23	3	23	3	26	0	140	210	复合	无	100	否	1500	β-类酰胺类	2	PCIA	无	6	尚可	5	1	2	2
34	男	84	160	65	25.3906	高血压、糖尿病、冠心病	4	小学	3	髋关节置换术	23	19	4	20	3	20	3	130	160	全麻	无	50	否	1100	喹诺酮类	3	PCIA	无	7	欠佳	4	2	3	1
35	男	69	162	55	20.9572	高血压、糖尿病	3	文盲	3	股骨骨折内固定	24	23	1	23	1	24	0	180	270	复合	无	300	否	2100	β-类酰胺类	2	PCIA	无	7	可	5	1	2	2
36	男	78	165	60	22.0386	高血压、糖尿病、冠心病	3	小学	3	胃癌根治	24	23	1	23	1	23	1	220	300	全麻	无	100	否	1800	β-类酰胺类	5	PCIA	无/入	9	可	8	4	7	4
37	女	76	150	65	28.8889	高血压、贫血	3	文盲	3	胸腔镜肺叶切除	26	21	5	25	1	25	1	120	180	复合	无	100	否	1600	喹诺酮类	4	PCIA	心律失常	8	欠佳	5	1	2	1
38	男	69	169	69	24.1588	心律失常	3	初中	3	胸腔镜肺叶切除	27	27	0	27	0	26	1	140	210	复合	无	100	否	1450	β-类酰胺类	5	PCIA	无	6	可	4	1	3	1
39	男	66	161	65	25.0762	糖尿病、肺大泡	3	初中	3	骨折内固定	28	27	1	29	-1	28	0	130	180	复合	无	50	否	1600	喹诺酮类	2	PCIA	无	7	可	4	1	2	1
40	女	68	154	65	27.4077	高血压、糖尿病	3	小学	3	腹腔镜结肠癌根治	25	22	3	24	1	25	0	135	190	全麻	无	50	否	1700	喹诺酮类	5	PCIA	无	10	可	9	2	5	5
41	男	74	166	62	22.4996	慢支炎、心律失常	3	初中	3	肺叶切除术	27	26	1	27	0	27	0	155	200	全麻	无	200	否	1900	β-类酰胺类	4	PCIA	无	7	可	5	1	2	2
42	男	67	156	63	25.8876	高血压、心律失常、肾功能异常	3	小学	3	骨折内固定	26	25	1	26	0	26	0	165	210	全麻	无	100	否	2000	β-类酰胺类	2	无	无	7	可	5	1	2	1
43	女	79	145	43	20.4518	慢支炎、高血压	4	文盲	3	腹腔镜直肠癌根治术	24	21	3	23	1	23	1	180	240	全麻	无	100	否	1700	β-类酰胺类	5	PCIA	无	8	尚可	12	3	6	5
44	女	68	150	60	26.6667	肺大泡、糖尿病	3	初中	3	骨折内固定	27	26	1	27	0	27	0	180	240	全麻	无	30	否	1600	β-类酰胺类	3	PCIA	无	7	可	6	1	2	2
45	男	70	159	65	25.711	慢支炎、糖尿病	3	小学	3	腹腔镜胃癌根治术	24	21	3	24	0	24	0	170	240	全麻	无	50	否	2000	β-类酰胺类	4	PCIA	无	9	可	10	3	6	5
46	男	81	166	62	22.4996	高血压、贫血	3	高中	3	髋关节置换术	28	28	0	28	0	28	0	150	190	复合	无	200	否	1500	β-类酰胺类	3	PCIA	无	8	可	5	1	3	3
47	男	79	172	75	25.3515	冠心病、肺气肿	3	初中	3	胸腔镜肺叶切除	26	26	0	26	0	26	0	140	220	复合	无	200	否	1100	β-类酰胺类	5	PCIA	无	7	可	6	1	2	2
48	男	86	163	70	26.3465	肾功能异常、高血压	4	初中	3	胸腔镜肺叶切除	24	21	3	23	1	21	3	150	215	复合	无	100	否	1200	β-类酰胺类	5	PCIA	无	6	可	5	1	3	1
49	男	69	174	68	22.46	冠心病、肺气肿	3	小学	3	食管癌根治	25	25	0	25	0	25	0	185	240	全麻	无	100	否	2000	β-类酰胺类	6	无	无	10	尚可	10	5	11	5
50	女	74	149	50	22.5215	哮喘、冠心病	3	文盲	3	踝关节骨折	21	21	0	21	0	22	-1	150	200	复合	无	30	否	1300	β-类酰胺类	3	PCIA	无	6	可	3	1	2	2

## Sheet: Sheet2
对照组
性别	年龄	身高	体重	BMI	合并症	衰弱评分	教育程度	ASA分级	手术名称	术前MMSE评分	术后1天MMSE评分	分值差	术后7天MMSE评分	分值差	术后14天MMSE评分	分值差	手术时间	麻醉时间	麻醉方法	术中不良事件	出血量	是否输血	输液量	抗生素	术后抗生素使用天数	术后镇痛	术后并发症/ICU	术后 住院时间	睡眠情况	排气时间	进食流质食物时间	进食固体食物时间	排便时间
男	78	155	47	19.563	肺气肿，双侧颈动脉斑块形成，心律失常，贫血	3	文盲	3	骨折内固定	22	18	4	20	2	22	0	120	140	复合	无	10	否	1100	β-类酰胺类	3	无	无	7	可	7	1	3	2
男	69	155	60	24.974	高血压、甲癌术后	3	初中	3	结肠癌根治	25	24	1	25	0	25	0	157	210	全麻	无	100	否	2200	β-类酰胺类	5	PCIA	无	10	尚可	10	2	4	4
女	66	150	61	27.1111	糖尿病、心律失常	3	文盲	2	骨折内固定	27	27	0	27	0	27	0	120	150	全麻	无	30	否	600	喹诺酮类	2	无	无	7	可	6	1	3	3
男	78	160	69	26.9531	高血压、气管炎、心律失常	4	文盲	3	直肠癌根治	25	24	1	24	1	25	0	120	160	复合	无	5	否	1000	无	6	无	无	10	欠佳	12	2	4	4
男	70	165	55	20.202	高血压、糖尿病、冠心病	4	小学	3	肺部分切除	27	26	1	28	-1	27	0	124	180	复合	无	200	否	1800	β-类酰胺类	5	PCIA	无	7	可	7	1	3	3
女	87	148	47	21.4573	慢性肾脏病3期,冠心病，肺气肿，频发室早	4	文盲	3	骨折内固定	26	20	6	22	4	23	3	143	190	复合	无	100	否	1450	β-类酰胺类	3	PCIA	无	7	欠佳	7	1	2	3
男	71	160	54	21.0938	糖尿病，颈动脉斑块，可疑高血压	3	初中	3	腰椎减压	27	24	3	24	3	26	1	178	240	全麻	无	400	否	2450	喹诺酮类	3	PCIA	无	7	尚可	8	2	3	2
女	67	160	60	23.4375	高血压、过敏性哮喘	3	初中	3	胃癌根治术	30	30	0	30	0	30	0	147	180	全麻	无	50	否	1600	β-类酰胺类	4	无	无	11	尚可	9	3	6	5
女	72	157	78	31.6443	高血压；糖尿病；慢支炎	3	初中	3	肺部分切除	27	23	4	25	2	26	1	130	190	复合	无	100	否	1550	β-类酰胺类	4	PCIA	无	9	欠佳	8	1	3	2
男	77	160	42	16.4062	高血压、帕金森、肝功异常	4	初中	3	结肠癌根治	27	26	1	28	-1	27	0	124	180	全麻	无	10	否	1500	β-类酰胺类	5	无	无	11	欠佳	10	3	5	4
男	78	173	80	26.7299	高血压、多次手术史	3	高中	3	直肠癌根治术	27	27	0	27	0	27	0	129	165	全麻	无	100	否	1100	β-类酰胺类	4	无	无	12	可	10	3	5	4
男	70	164	65	24.1672	慢阻肺,高血压，糖尿病	3	初中	3	肺部分切除	29	26	3	26	3	28	1	154	220	复合	无	200	否	1600	β-类酰胺类	5	无	肺部感染	7	欠佳	7	1	2	3
男	73	160	77	30.0781	多次手术史	3	初中	3	骨折内固定	27	24	3	26	1	26	1	120	165	全麻	无	200	否	2200	β-类酰胺类	2	PCIA	无	8	可	7	1	2	2
女	67	165	60	22.0386	高血压、冠心病	3	小学	3	骨折内固定	25	22	3	21	4	24	1	170	230	复合	无	20	否	1100	β-类酰胺类	2	无	无	9	可	8	1	2	2
女	71	162	67	25.5296	美尼尔综合征、颈动脉斑块	3	小学	2	骨折内固定	27	26	1	28	-1	27	0	170	220	复合	无	200	否	2200	β-类酰胺类	2	PCIA	无	8	欠佳	8	1	3	2
男	80	163	50	18.8189	高血压、心律失常、肺气肿	4	初中	3	结肠癌根治	27	27	0	27	0	27	0	190	240	全麻	无	120	否	1700	喹诺酮类	5	PCIA	无/入	11	尚可	11	4	6	5
女	73	155	54	22.4766	右眼失明	3	文盲	3	骨折内固定	26	25	1	27	-1	26	0	137	200	复合	无	20	否	1600	β-类酰胺类	2	PCIA	无	7	尚可	6	1	2	2
男	84	168	52	18.424	高血压、肝功能异常、COPD	4	文盲	3	肺部分切除	25	21	4	25	0	25	0	178	260	全麻	无	100	否	1800	β-类酰胺类	5	PCIA	无	8	可	7	1	3	2
男	75	165	62	22.7732	高血压，心律失常	3	小学	3	胃癌根治	26	26	0	26	0	26	0	170	256	全麻	无	600	否	2200	β-类酰胺类	4	无	无	10	尚可	9	5	7	3
男	78	163	58	21.8299521999323	贫血、肺大泡、肋骨骨折、血小板异常等	4	小学	3	骨折内固定	27	24	3	26	1	26	1	170	237	复合	无	850	是	2100	喹诺酮类	3	PCIA	无/入	9	欠佳	7	1	2	1
男	71	169	66	23.1084	高血压病 糖尿病	3	高中	3	肺部分切除	28	25	3	27	1	27	1	144	173	全麻	无	200	否	1600	β-类酰胺类	6	无	无	7	尚可	8	1	3	2
男	70	164	52	19.3337	高血压、COPD	3	小学	3	肺部分切除	27	26	1	27	0	27	0	120	290	复合	无	150	否	2000	β-类酰胺类	5	PCIA	无	7	可	6	1	2	1
女	73	145	50	23.7812	高血压	3	小学	2	胃癌根治	25	24	1	26	-1	26	-1	150	230	全麻	无	300	否	2400	喹诺酮类	5	PCIA	无	10	欠佳	10	5	7	4
男	75	160	70	27.3438	肺气肿、脓毒症	4	文盲	3	肺部分切除	24	19	5	21	3	22	2	170	210	全麻	无	20	否	1300	β-类酰胺类	5	PCIA	无	9	尚可	8	1	3	1
女	72	143	41	20.0499	肝功能异常、听力下降等	3	文盲	3	骨折内固定	27	27	0	27	0	27	0	160	210	复合	无	20	否	1600	β-类酰胺类	2	无	无	8	可	8	1	2	2
女	78	149	31	13.9633	血肿瓣膜柄、肺气肿、贫血	4	文盲	3	胃癌根治	23	24	-1	23	0	23	0	170	240	全麻	无	50	否	1600	β-类酰胺类	4	PCIA	呼吸衰竭/入	11	尚可	10	5	7	4
男	73	170	55	19.0311	冠心病、高血压、糖尿病	3	初中	3	肺部分切除	27	24	3	27	0	27	0	140	200	全麻	无	10	否	1400	否	6	PCIA	无	8	可	7	1	2	2
女	67	150	45	20	高血压、恶病质	3	文盲	3	结肠癌根治	25	24	1	25	0	26	-1	185	240	全麻	无	100	否	2100	喹诺酮类	4	PCIA	无	10	尚可	11	4	6	5
男	69	162	56	21.3382	心律失常	3	小学	3	胃癌根治	27	27	0	28	-1	28	-1	185	230	全麻	无	100	否	2100	β-类酰胺类	4	PCIA	无	10	可	10	4	7	3
女	82	150	50	22.2222	高血压、心律失常	4	初中	3	骨折内固定	27	24	3	24	3	24	3	170	230	复合	无	100	否	1500	否	3	PCIA	心律失常	9	可	7	1	3	1
男	88	176	85	27.4406	高血压、糖尿病、高心病	3	小学	3	肺部分切除	25	22	3	22	3	25	0	140	170	全麻	无	1	否	1400	β-类酰胺类	5	PCIA	无	8	欠佳	6	1	2	2
男	76	160	61	21.875	高血压、糖尿病、心脏瓣膜病	4	文盲	3	肺部分切除	26	25	1	25	1	27	-1	200	250	复合	无	20	否	2300	喹诺酮类	4	PCIA	无/入	7	可	8	1	3	1
男	82	165	60	22.0386	高血压	3	小学	3	骨折内固定	26	23	3	23	3	26	0	150	210	复合	无	100	否	1100	β-类酰胺类	2	PCIA	无	9	欠佳	7	1	2	2
女	73	150	60	26.6667	慢支炎	3	小学	3	全膝关节置换	27	24	3	25	2	26	1	185	250	全麻	无	200	否	2300	喹诺酮类	3	PCIA	无/入	9	可	6	1	2	1
男	77	147	53	24.5268	心律失常	3	文盲	3	直肠癌根治	24	21	3	21	3	21	3	190	240	全麻	无	10	否	2200	喹诺酮类	5	PCIA	无/入	11	可	12	3	6	6
女	72	155	50	20.8117	高血压、心律失常	3	文盲	3	腰椎减压	25	24	1	25	0	25	0	180	240	全麻	无	400	否	2100	β-类酰胺类	3	PCIA	无	8	尚可	7	2	3	2
男	70	165	69	25.3444	高血压	3	初中	3	直肠癌根治	27	27	0	27	0	27	0	180	240	全麻	无	100	否	2300	β-类酰胺类	6	PCIA	无	10	欠佳	13	3	6	3
女	73	155	60	24.974	高血压、糖尿病、冠心病	4	文盲	3	肱骨骨折内固定	21	17	4	18	3	21	0	150	220	复合	无	200	否	1300	β-类酰胺类	2	PCIA	无	7	欠佳	5	1	2	1
男	67	155	62	25.8065	肺气肿、喉癌术后	3	小学	3	肺叶切除	22	21	1	22	0	22	0	160	230	复合	无	100	否	1600	β-类酰胺类	5	PCIA	心律失常/入	8	可	8	1	2	2
男	78	156	50	20.5457	高血压、左肺全切术后	4	初中	3	结肠癌根治	24	21	3	23	1	24	0	175	240	复合	无	100	否	1700	β-类酰胺类	5	PCIA	无	12	尚可	12	3	5	6
女	69	164	62	23.0518	慢支炎、冠心病	3	小学	3	胃癌根治	26	23	3	23	3	26	0	190	250	全麻	无	100	否	2000	β-类酰胺类	6	PCIA	无	9	欠佳	9	5	7	3
男	78	175	70	22.8571	肺气肿、高血压	3	初中	3	肺叶切除	27	26	1	27	0	27	0	150	200	复合	无	200	否	1800	β-类酰胺类	6	PCIA	无	7	尚可	7	1	3	1
男	68	169	62	21.7079	高血压、糖尿病、冠心病	3	高中	3	髋关节置换	29	29	0	29	0	29	0	140	200	复合	无	300	否	2000	β-类酰胺类	3	PCIA	无	8	可	6	1	2	3
男	83	171	59	20.1771	糖尿病、冠心病	3	初中	3	结肠癌根治	26	25	1	26	0	26	0	185	240	全麻	无	100	否	2200	β-类酰胺类	5	PCIA	无	10	可	11	4	6	5
女	79	143	48	23.473	高血压、贫血	3	文盲	3	肺部分切除	24	21	3	21	3	21	3	150	190	全麻	无	50	否	1500	β-类酰胺类	5	PCIA	无	8	可	8	1	2	2
女	75	150	50	22.2222	哮喘、冠心病	3	初中	3	胸腔镜肺叶切除	26	25	1	26	0	26	0	130	170	复合	无	100	否	1400	喹诺酮类	4	PCIA	无	7	可	6	1	2	2
男	69	152	67	28.9993	肺气肿、心律失常	3	小学	3	食管癌根治	25	24	1	25	0	26	-1	190	240	全麻	无	50	否	2000	β-类酰胺类	7	无	无/入	11	欠佳	12	6	11	7
男	73	169	72	25.2092	高血压、心律失常	3	初中	3	胃癌根治	26	25	1	26	0	27	-1	200	250	全麻	无	50	否	1700	β-类酰胺类	5	PCIA	无/入	10	可	11	4	6	3
男	85	178	71	22.4088	冠心病、糖尿病、贫血	3	高中	3	胸腔镜肺叶切除	29	29	0	29	0	30	-1	140	200	复合	无	100	否	1200	β-类酰胺类	5	PCIA	无	8	可	7	2	2	2
男	66	161	49	18.9036	肾功能异常、高血压、慢支炎	3	初中	3	骨折内固定	26	25	1	26	0	26	0	150	190	全麻	无	30	否	1600	β-类酰胺类	2	无	无	7	尚可	4	1	3	2
